# Supplementary material for: Association between Cerebrospinal Fluid and Serum Biomarker Levels and Diagnosis, Injury Severity, and Short-Term Outcomes in Patients with Acute Traumatic Spinal Cord Injury
Source: MDPI journal article supplement (doi:10.3390/diagnostics13101814), 2023-05-22
Supplement: s1 [file s1]

**Table S1.** Correlation between CSF biomarker (SBDP150, UCH-L, S100B, Tau, GFAP, NF-L, IL-6) day one concentration patient with SCI and healthy control. \*p values < 0.05 were considered statistically significant. AUC – area under the curve. CI – confidence intervals.

| <b>ROC of CSF biomarkers control vs SCI</b> |            |                 |           |
|---------------------------------------------|------------|-----------------|-----------|
| <b>Biomarkers</b>                           | <b>AUC</b> | <b>95% CI</b>   | <b>*P</b> |
| <b>SBDP150</b>                              | 0.9036     | 0.7766 – 1.031  | 0.0009453 |
| <b>S100b</b>                                | 0.9357     | 0.8129 – 1.059  | 0.0003579 |
| <b>IL-6</b>                                 | 0.9286     | 0.8120 – 1.045  | 0.0004466 |
| <b>GFAP</b>                                 | 0.9231     | 0.7782 – 1.068  | 0.0006525 |
| <b>NFL</b>                                  | 0.9769     | 0.9239 – 1.030  | 0.0001220 |
| <b>UCHL-1</b>                               | 0.7846     | 0.5823 – 0.9869 | 0.02179   |
| <b>Tau</b>                                  | 0.8077     | 0.6230 – 0.9924 | 0.01315   |

**Table S2.** Correlation between serum biomarker (SBDP150, UCH-L, S100B, Tau, GFAP, NF-L, IL-6) concentration and diagnosis correlations in patients with SCI. \*p values < 0.05 were considered statistically significant. ROC= receiver operating characteristic AUC= area under the curve. CI = confidence intervals.

| <b>ROC of serum biomarkers control vs SCI</b> |            |                 |           |
|-----------------------------------------------|------------|-----------------|-----------|
| <b>Biomarkers</b>                             | <b>AUC</b> | <b>95% CI</b>   | <b>*P</b> |
| <b>SBDP150</b>                                | 1.000      | 1.000 – 1.000   | < 0.0001  |
| <b>S100b</b>                                  | 0.8100     | 0.6293 – 0.9907 | 0.009927  |
| <b>IL-6</b>                                   | 1.000      | 1.000 – 1.000   | < 0.0001  |
| <b>GFAP</b>                                   | 0.9643     | 0.8901 – 1.038  | 0.0006525 |
| <b>NFL</b>                                    | 1.000      | 1.000 – 1.000   | < 0.0001  |
| <b>UCHL-1</b>                                 | 0.9400     | 0.8537 – 1.026  | 0.0002538 |
| <b>Tau</b>                                    | 0.9400     | 0.8520 – 1.028  | 0.0002538 |

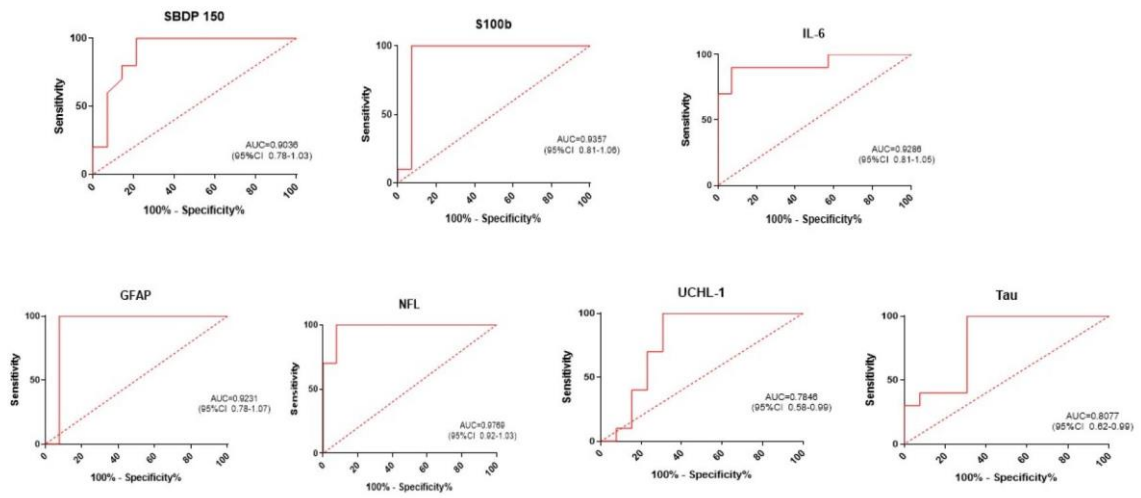

**Figure S1.** ROC curves for Day 1. CSF biomarkers for SCI patients versus controls for predicting the diagnosis of SCI.

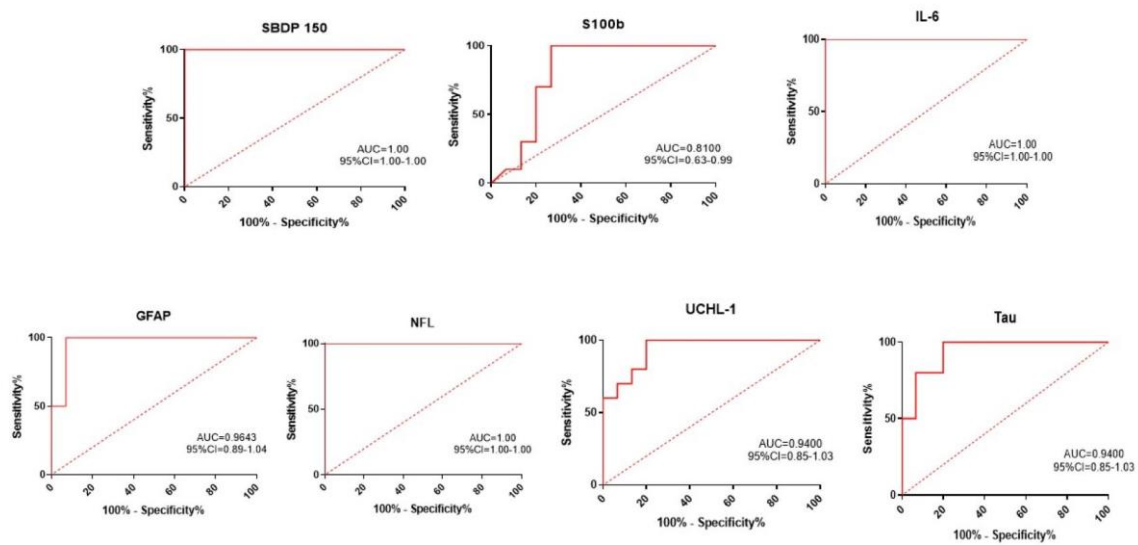

**Figure S2.** ROC curves for Day 1. Serum biomarkers for SCI patients versus controls for predicting the diagnosis of SCI.
